# Supplementary material
Source: PubMed Central journal article supplement (PMC2886598)
Supplement: NIHMS204638-supplement-SI.pdf [file NIHMS204638-supplement-SI.pdf]

# Supporting Information

## **Near-IR MCD of the Non-Heme Ferrous Active Site in Naphthalene 1,2-Dioxygenase: Correlation to Crystallography and Structural Insight into the Mechanism of Rieske Dioxygenases**

Takehiro Ohta,<sup>†</sup> Sarmistha Chakrabarty,<sup>‡</sup> John D. Lipscomb,<sup>\*,‡</sup> and Edward I. Solomon<sup>\*,†</sup>

*Department of Chemistry, Stanford University, Stanford, California 94305, and Department of Biochemistry, Molecular Biology, and Biophysics, and Center of Metals in Biocatalysis, University of Minnesota, Minneapolis, Minnesota 55455*

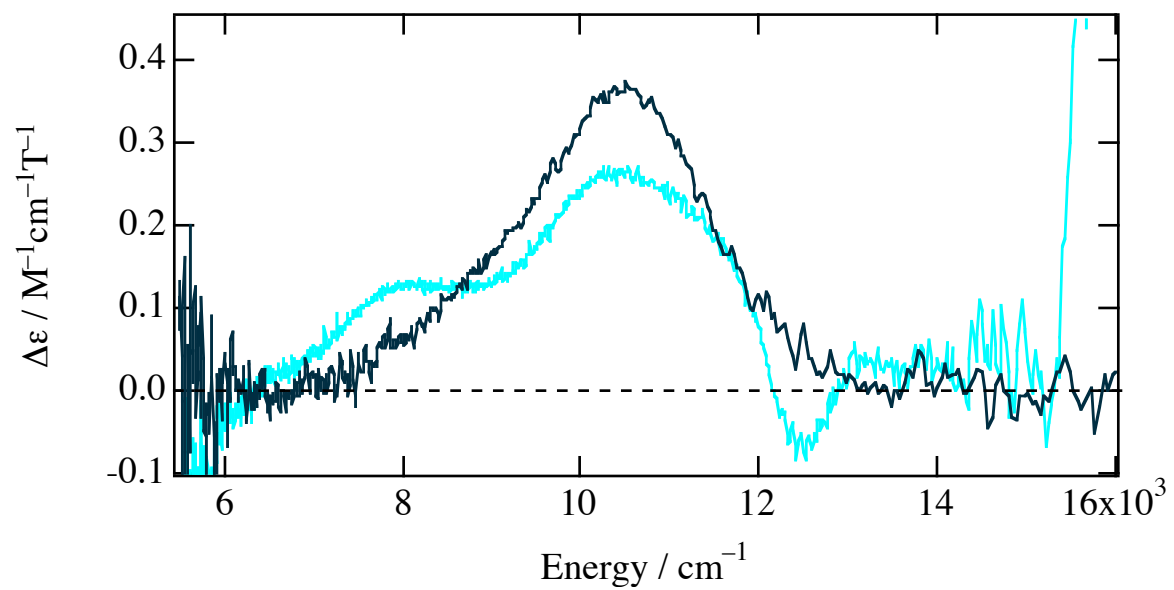

Figure S1. The overlay plot of the MCD spectra of NDOox-Naph (navy) and NDOred-Naph (aqua)

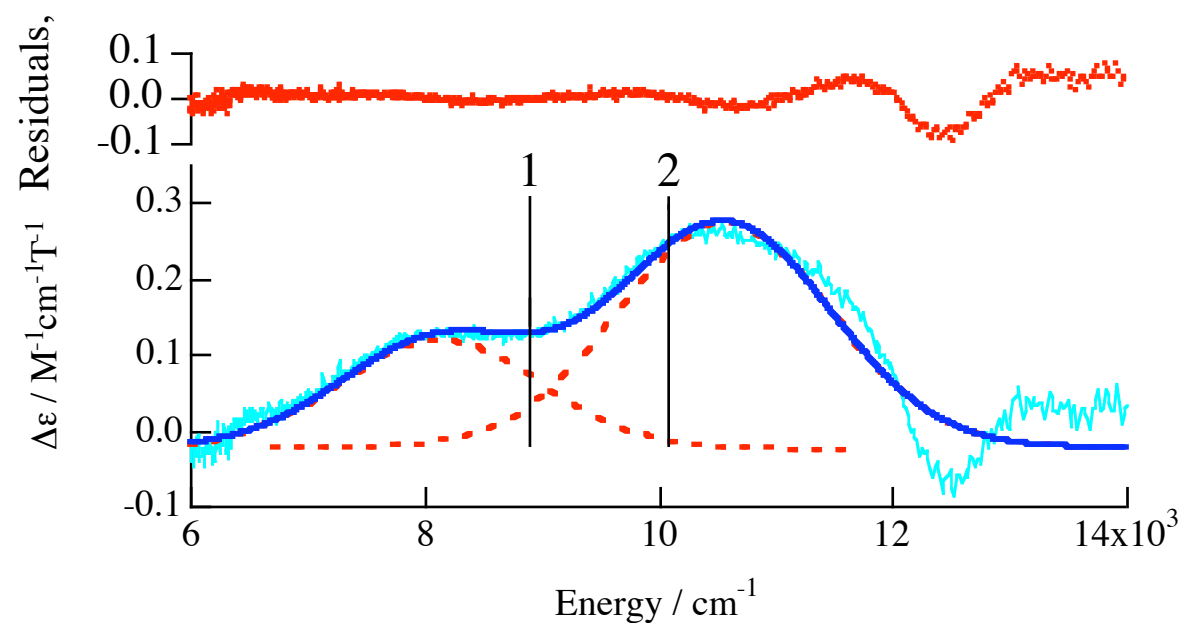

Figure S2. Deconvolution of the MCD spectrum of NDOred-Naph:  
**1** and **2** are 8890 and 10010  $\text{cm}^{-1}$ , respectively.

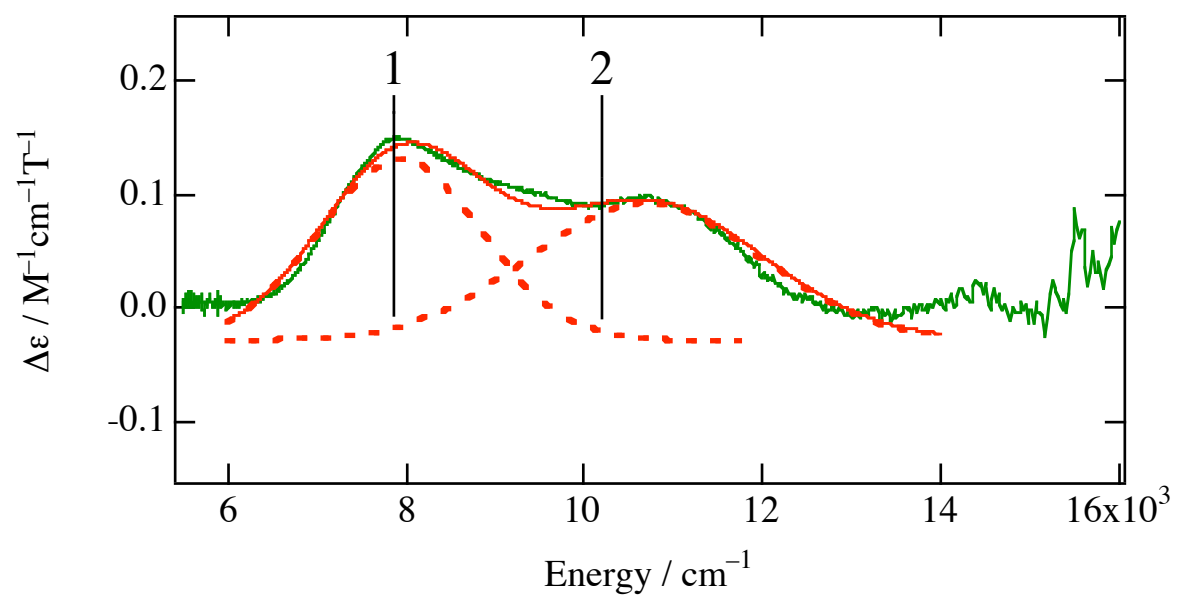

Figure S3. Deconvolution of the MCD spectrum of NDOox located two bands at 7950  $\text{cm}^{-1}$  and 10700  $\text{cm}^{-1}$  : **1** and **2** are 7810 and 10200  $\text{cm}^{-1}$ , respectively.

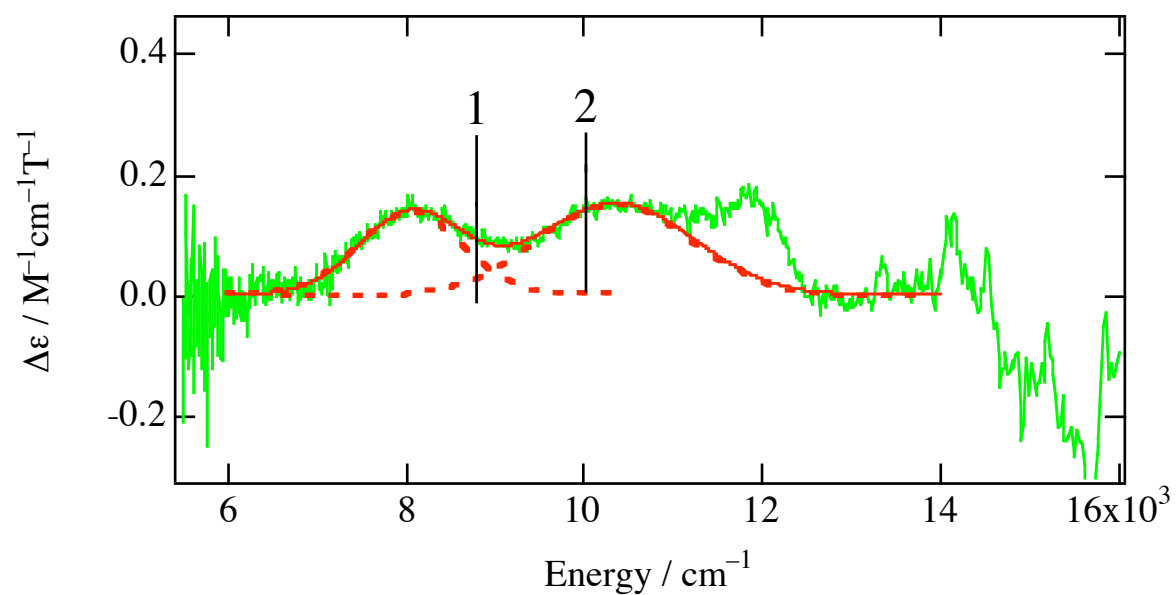

Figure S4. Deconvolution of the MCD spectrum of NDOox located two bands at 8060  $\text{cm}^{-1}$  and 10350  $\text{cm}^{-1}$ : **1** and **2** are 8810 and 10010  $\text{cm}^{-1}$ , respectively. At 8810  $\text{cm}^{-1}$ , the contribution from the 8060  $\text{cm}^{-1}$  and 10010  $\text{cm}^{-1}$  bands are 75 % and 25%, respectively.

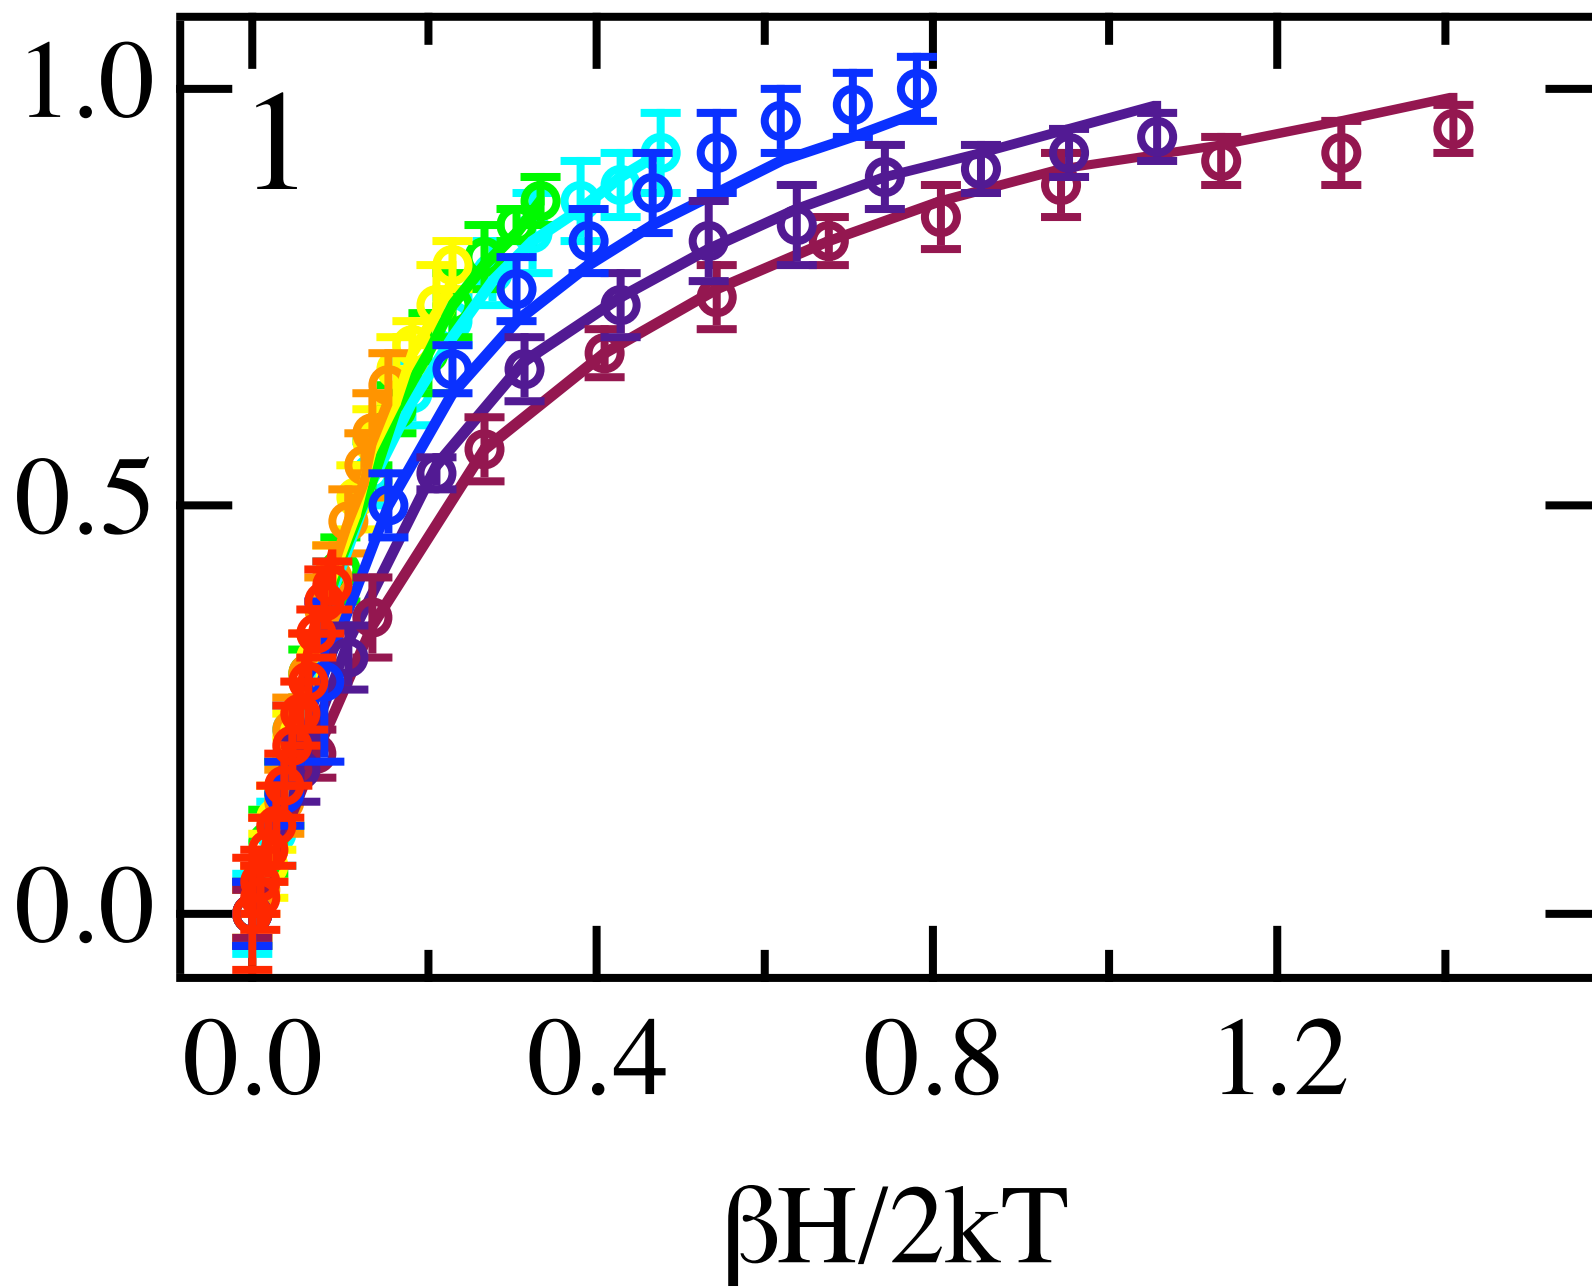

Figure S5. 3-fold expanded Figure 2B-1

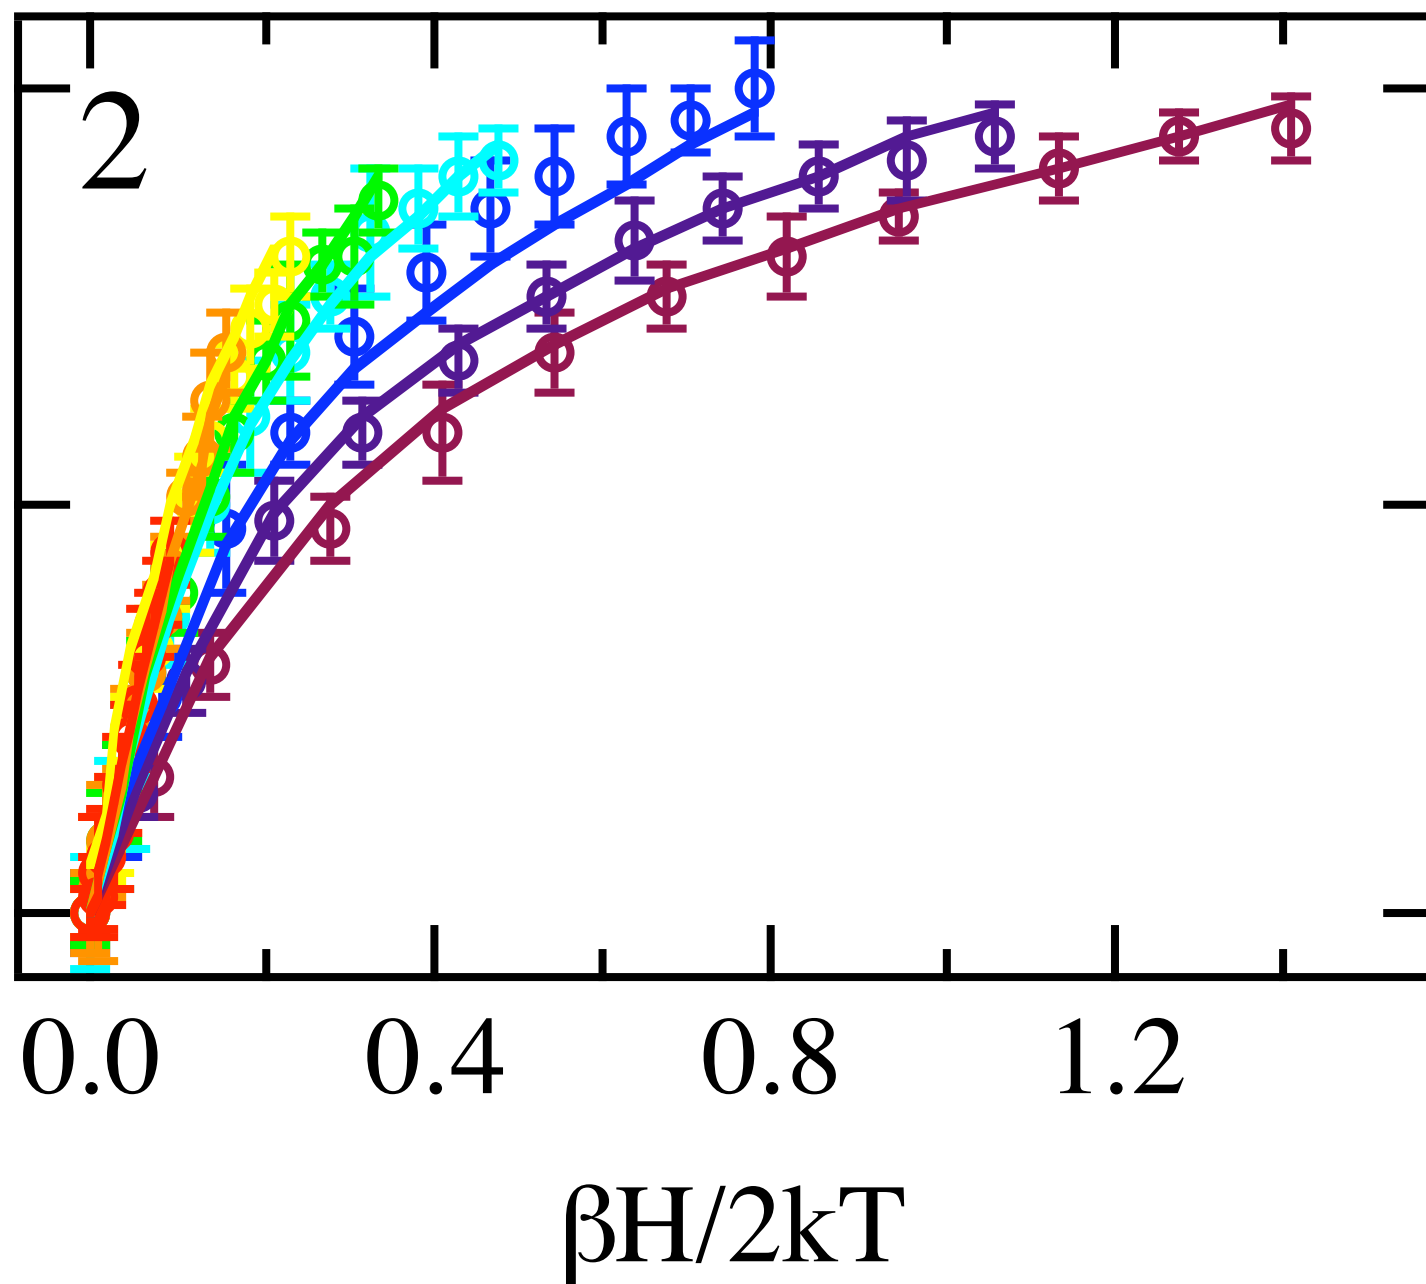

Figure S6. 3-fold expanded Figure 2B-2

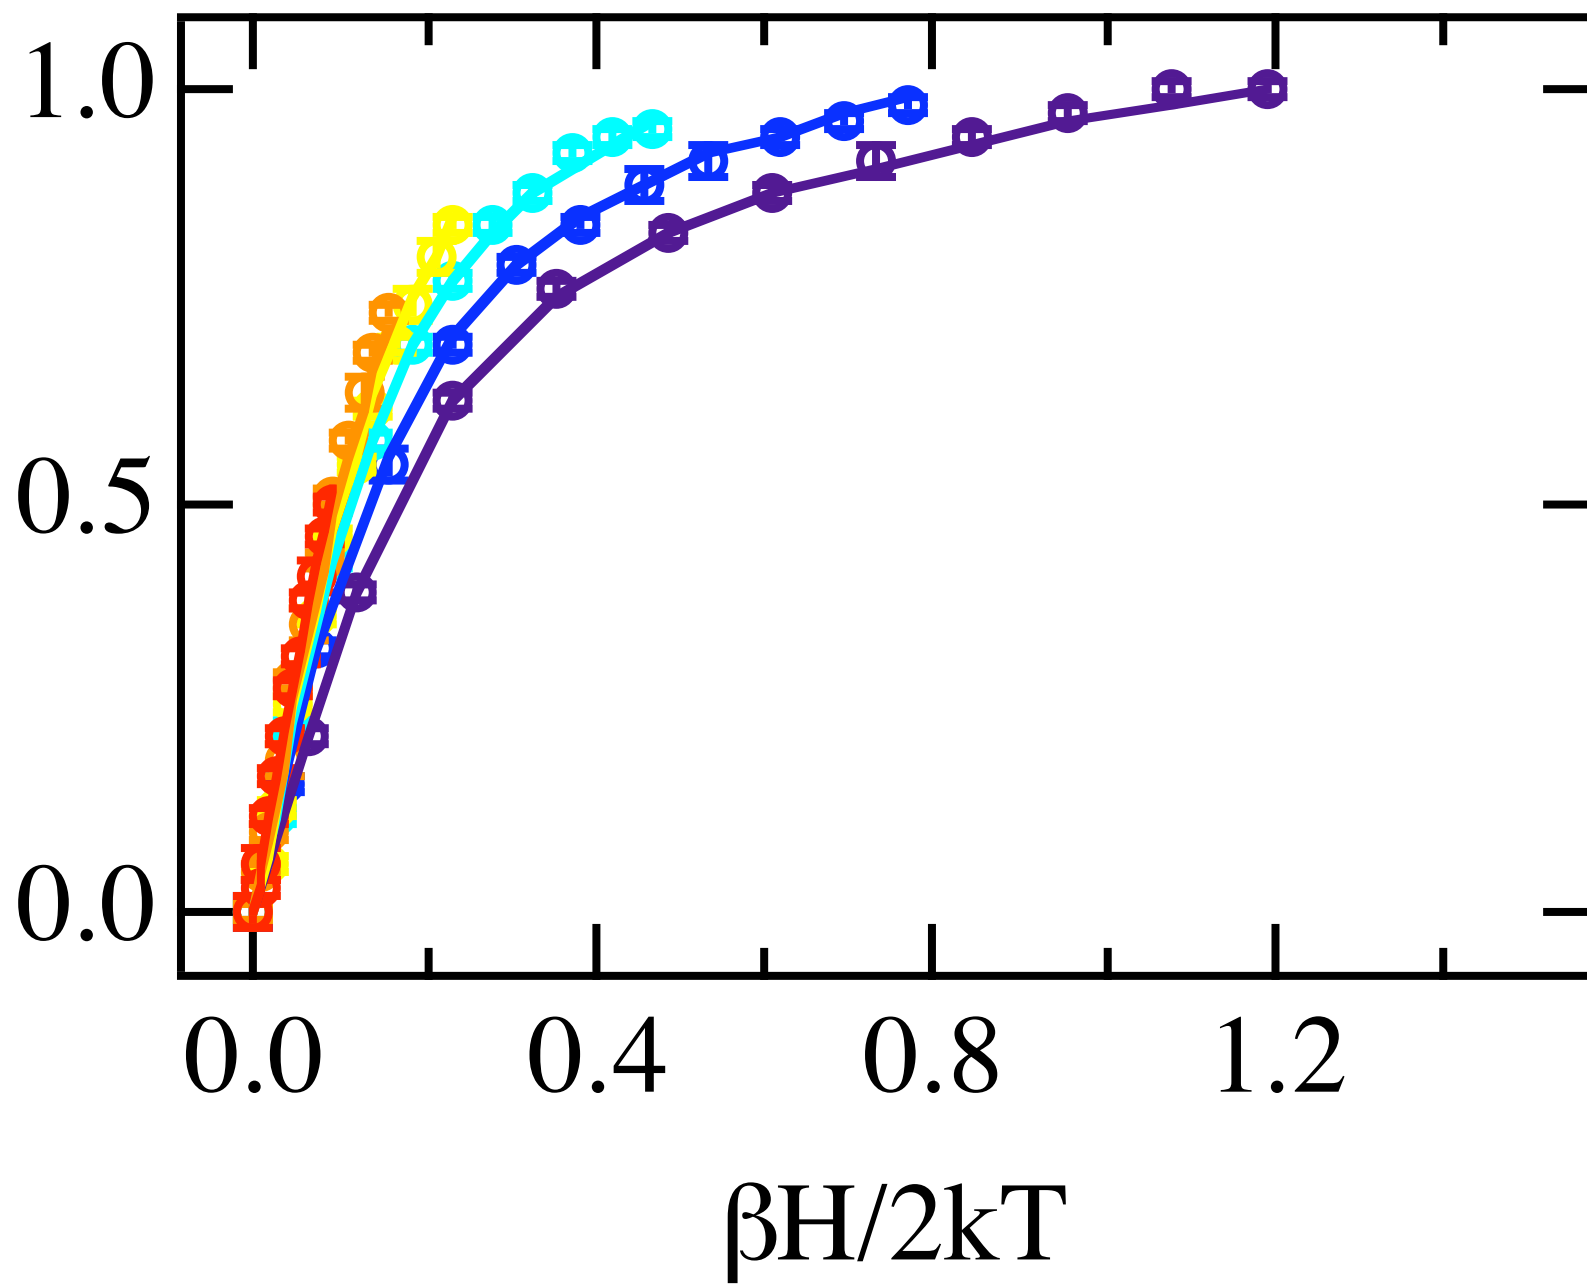

Figure S7. 3-fold expanded Figure 3B

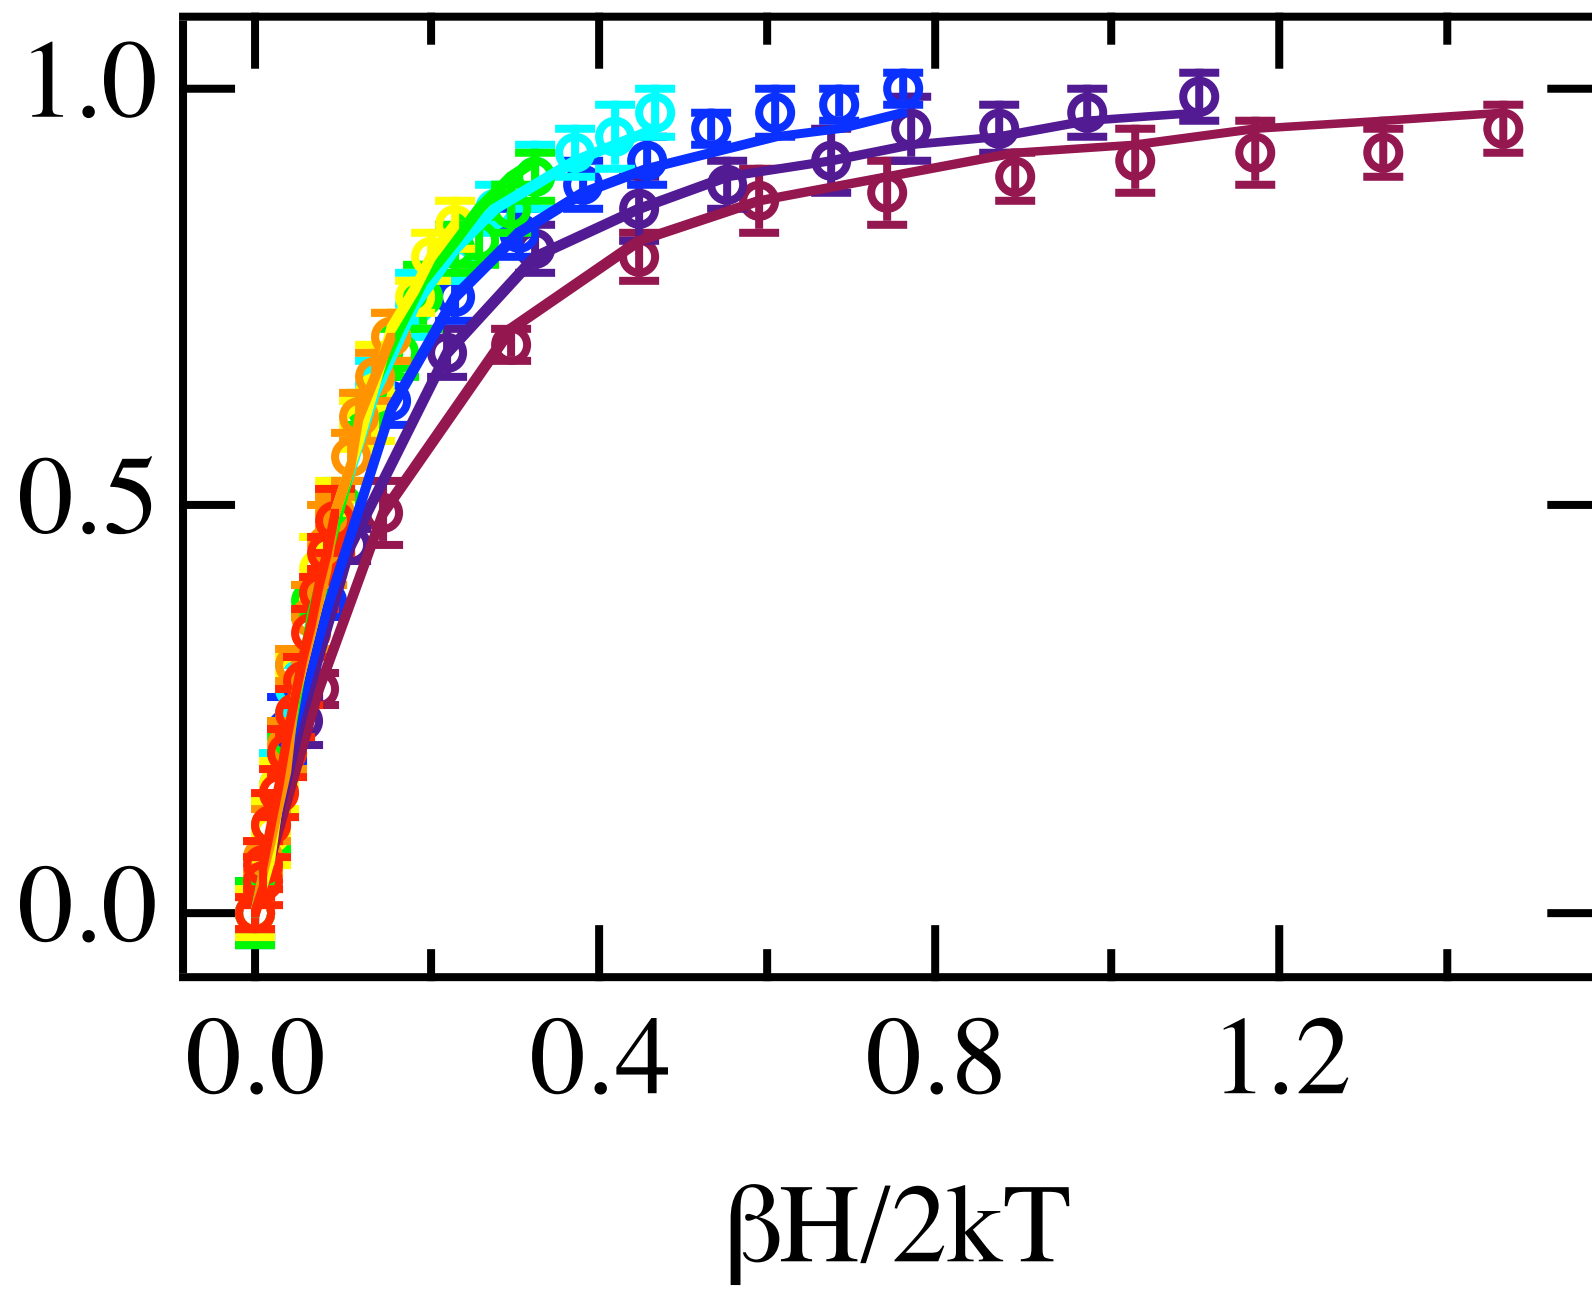

Figure S8. 3-fold expanded Figure 4B-1

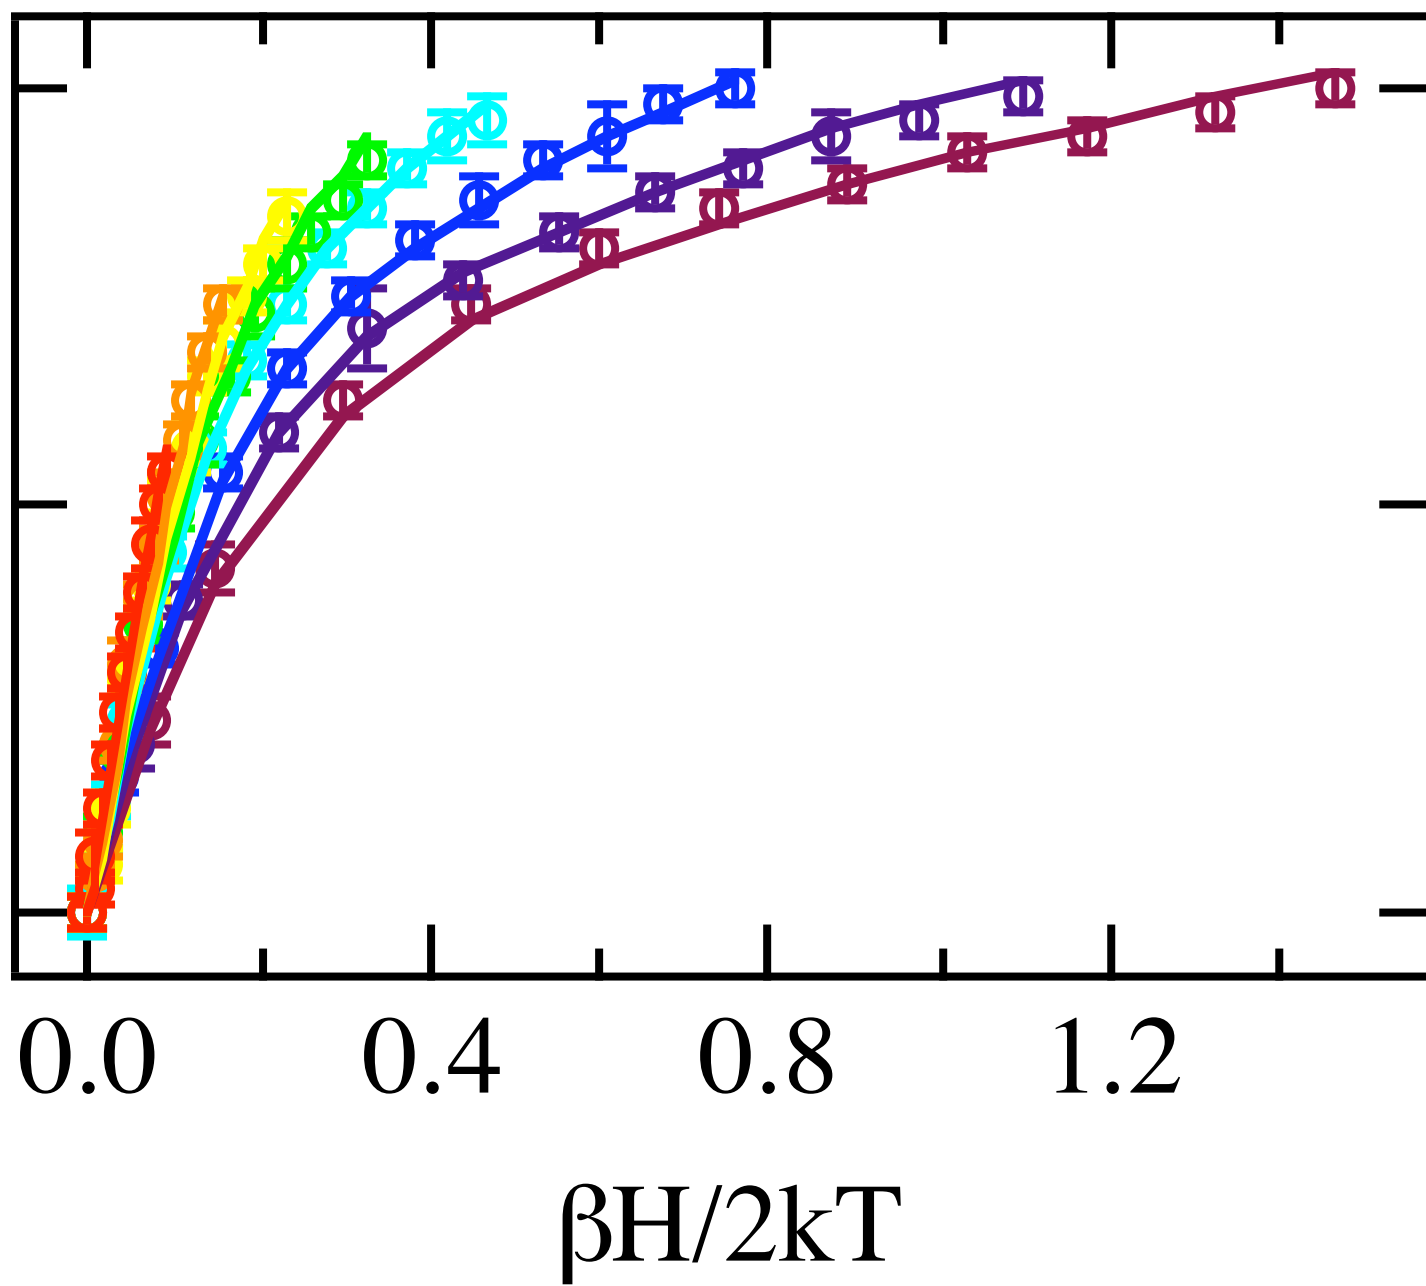

Figure S9. 3-fold expanded Figure 4B-2

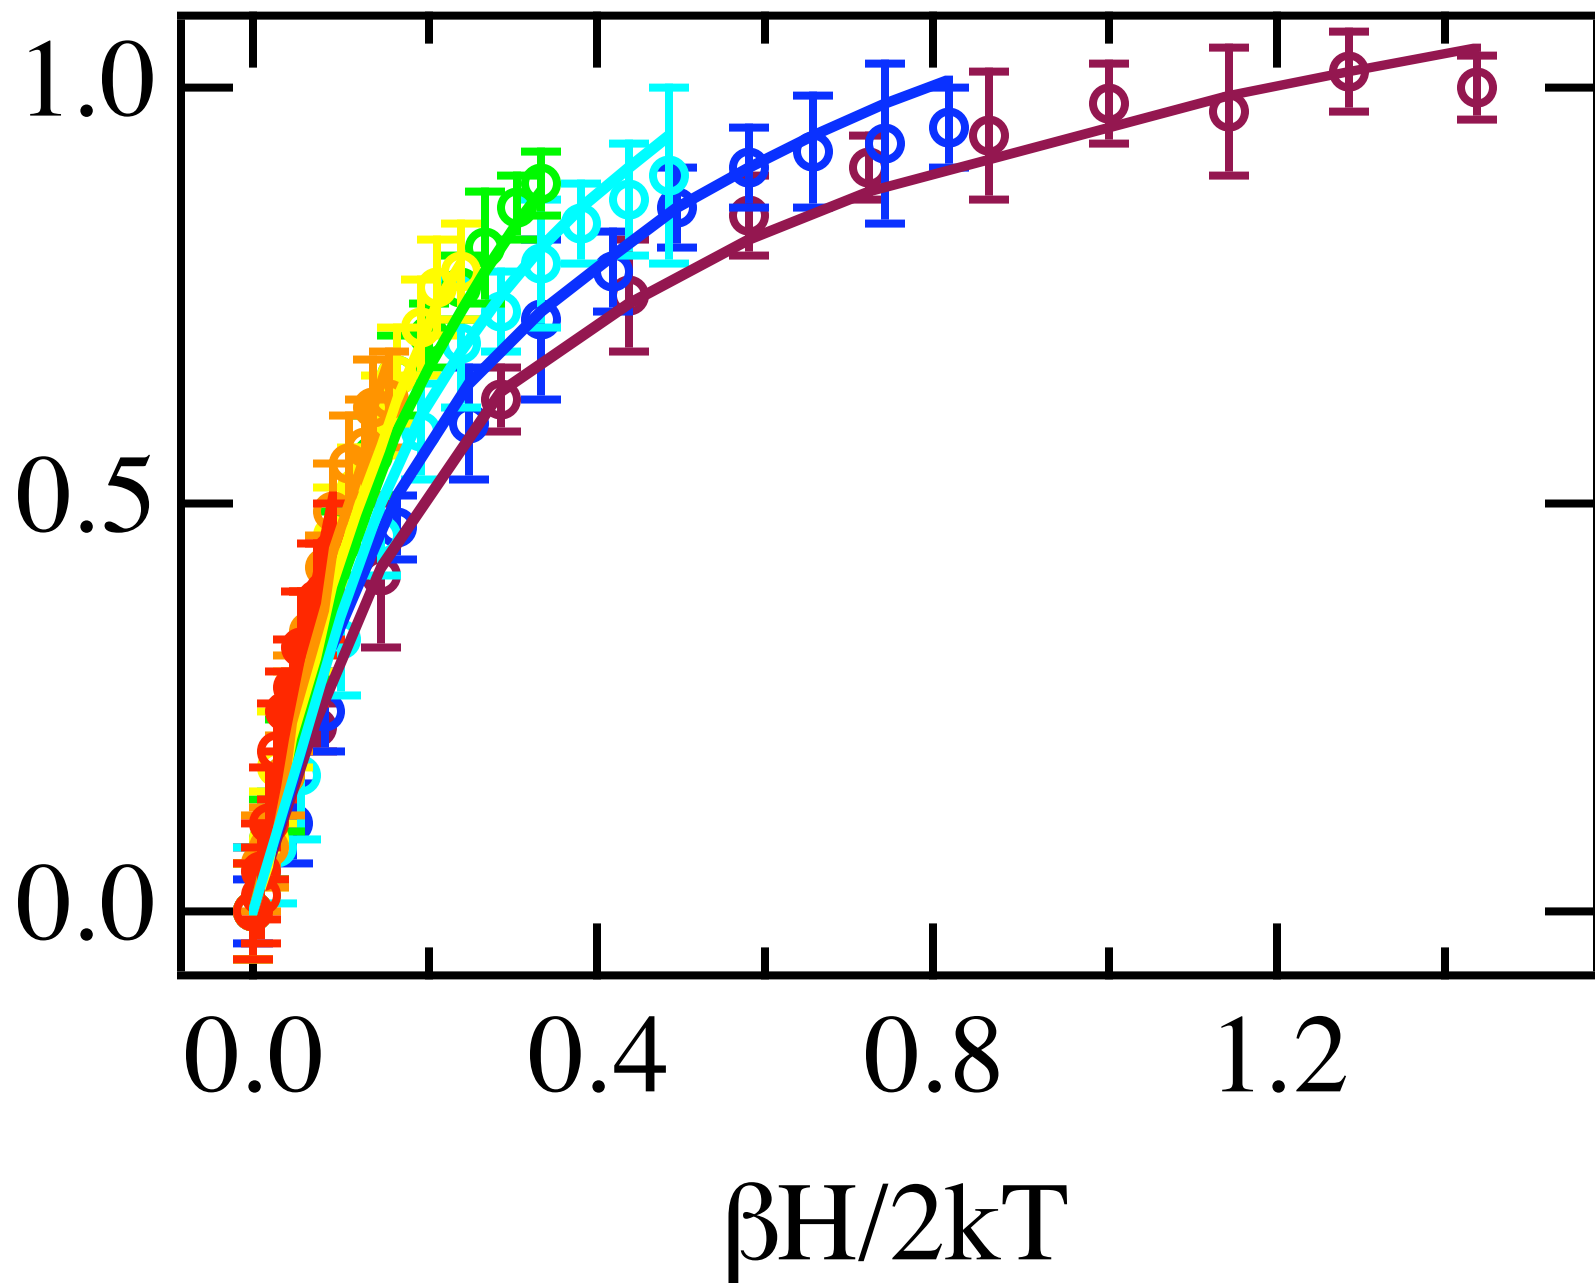

Figure S10. 3-fold expanded Figure 5B-1

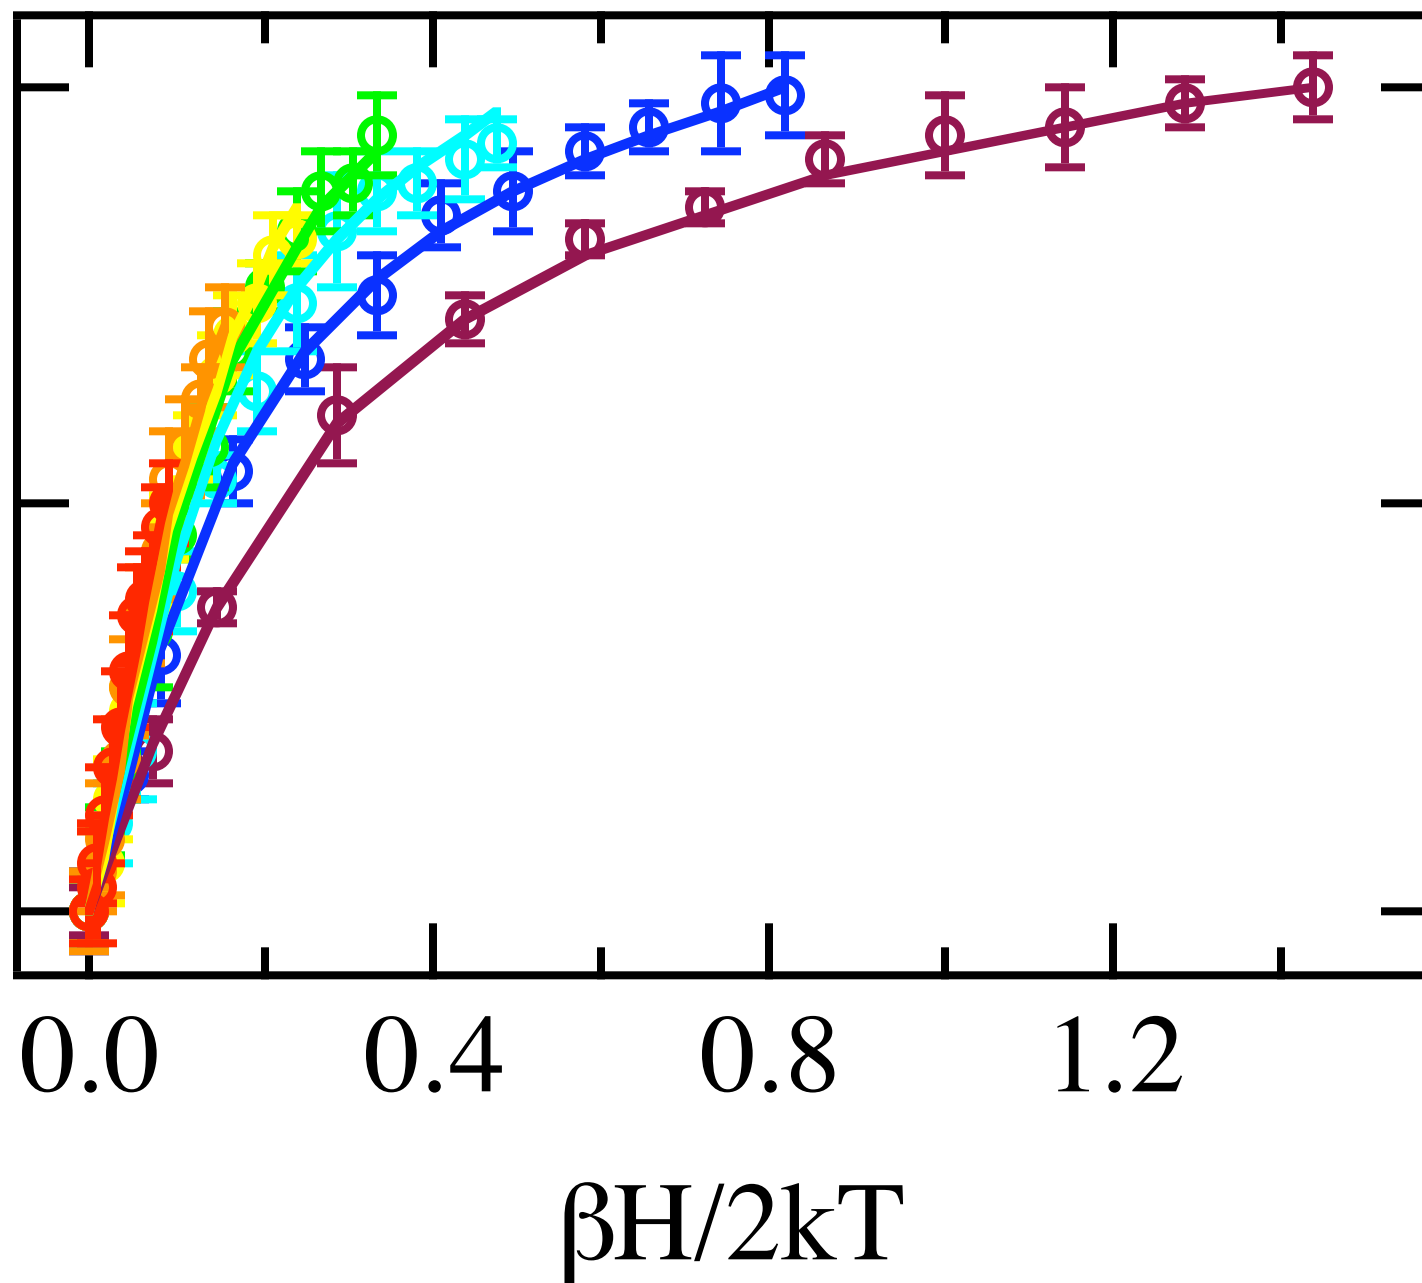

Figure S11. 3-fold expanded Figure 5B-2

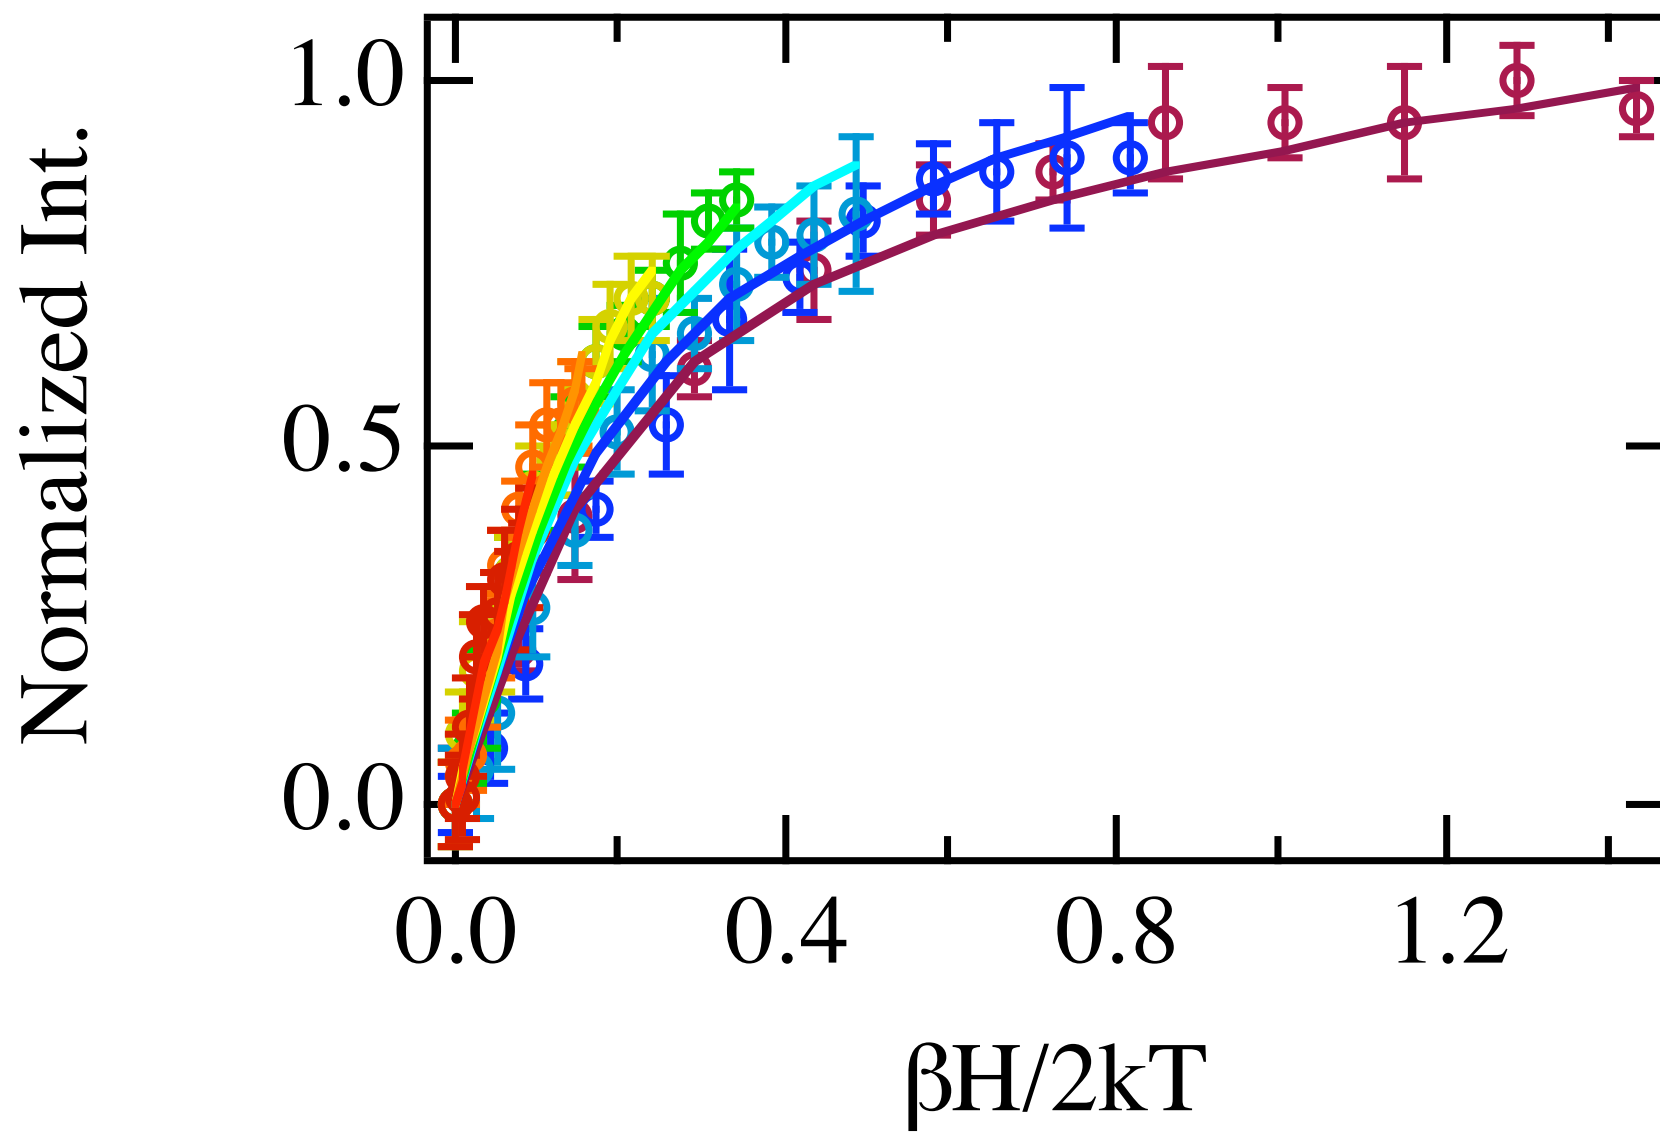

Figure S12. 3-fold expanded Figure 5C
